# Supplementary material for: Facile preparation of pH/reduction dual-responsive prodrug nanohydrogels for tumor-specific intracellular triggered release with enhanced anticancer efficiency
Source: Royal Society of Chemistry journal article supplement (doi:10.1039/c7tb00433h), 2017-01-01
Supplement: c7tb00433h1.pdf [file c7tb00433h1.pdf]

**Electronic Supplementary Information**

**Facile preparation of pH/reduction dual-responsive prodrug  
nanohydrogels for tumor-specific intracellular triggered  
release with enhanced anticancer efficiency**

*Tingting Zhou, Xu Jia, Xubo Zhao, Jiagen Li, and Peng Liu\**

State Key Laboratory of Applied Organic Chemistry and Key Laboratory of  
Nonferrous Metal Chemistry and Resources Utilization of Gansu Province, College of  
Chemistry and Chemical Engineering, Lanzhou University, Lanzhou 730000, China.

\* Corresponding Author. Tel./Fax: 86 0931 8912582. Email: [pliu@lzu.edu.cn](mailto:pliu@lzu.edu.cn).

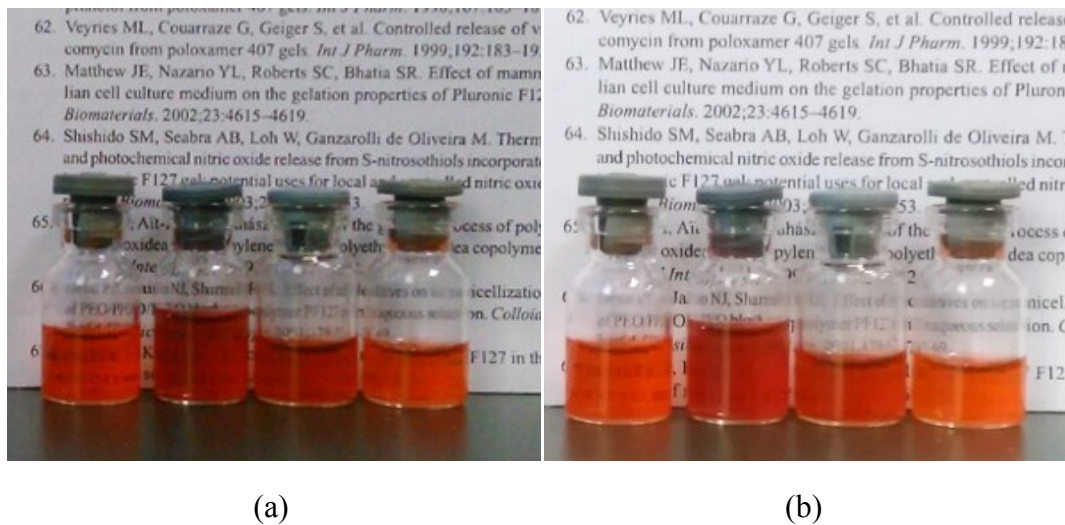

**Figure S1.** Digital photos of the DOX solution, the dispersions of the mPEG-OAL<sub>20.0</sub>-DOX/Cys prodrug nanohydrogels in pH 7.4 with 10 mM GSH, pH 5.0 with 10 mM GSH, and water (from left to right) for (a) 0 h and (b) 58 h.

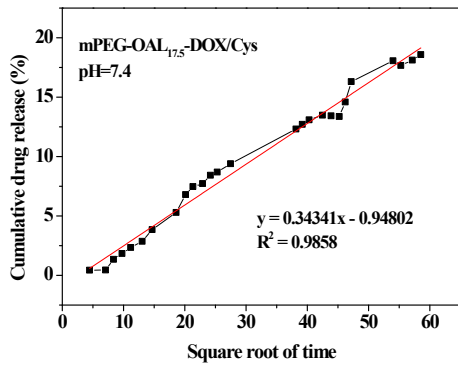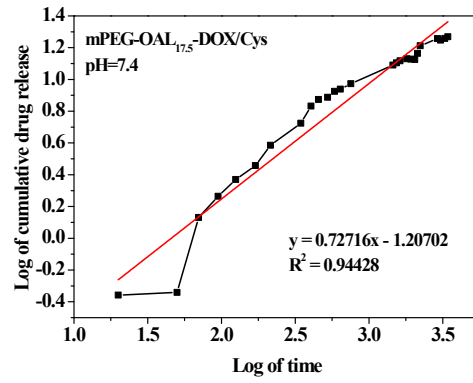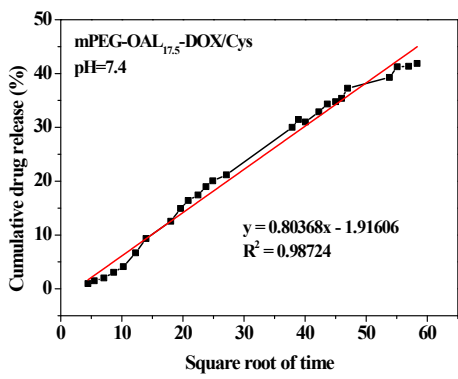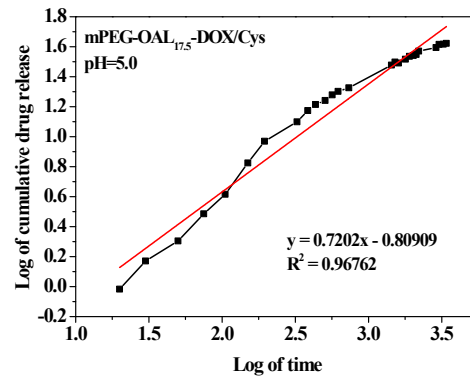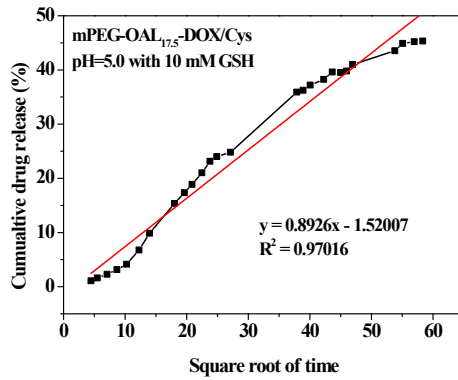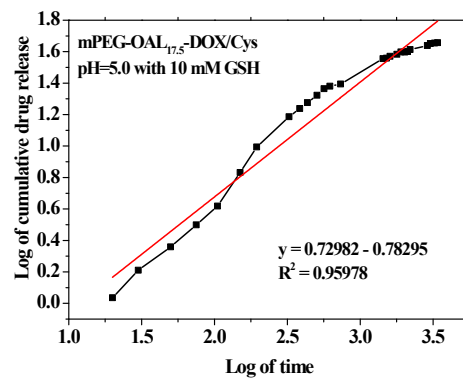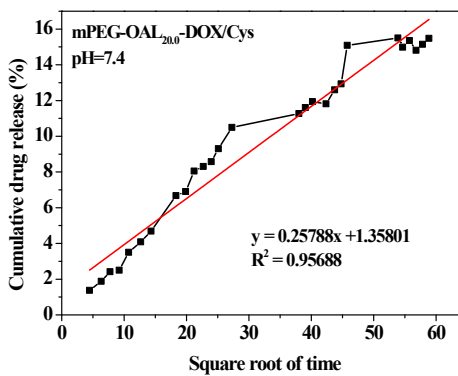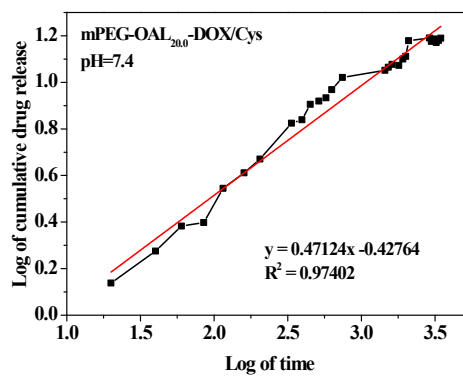

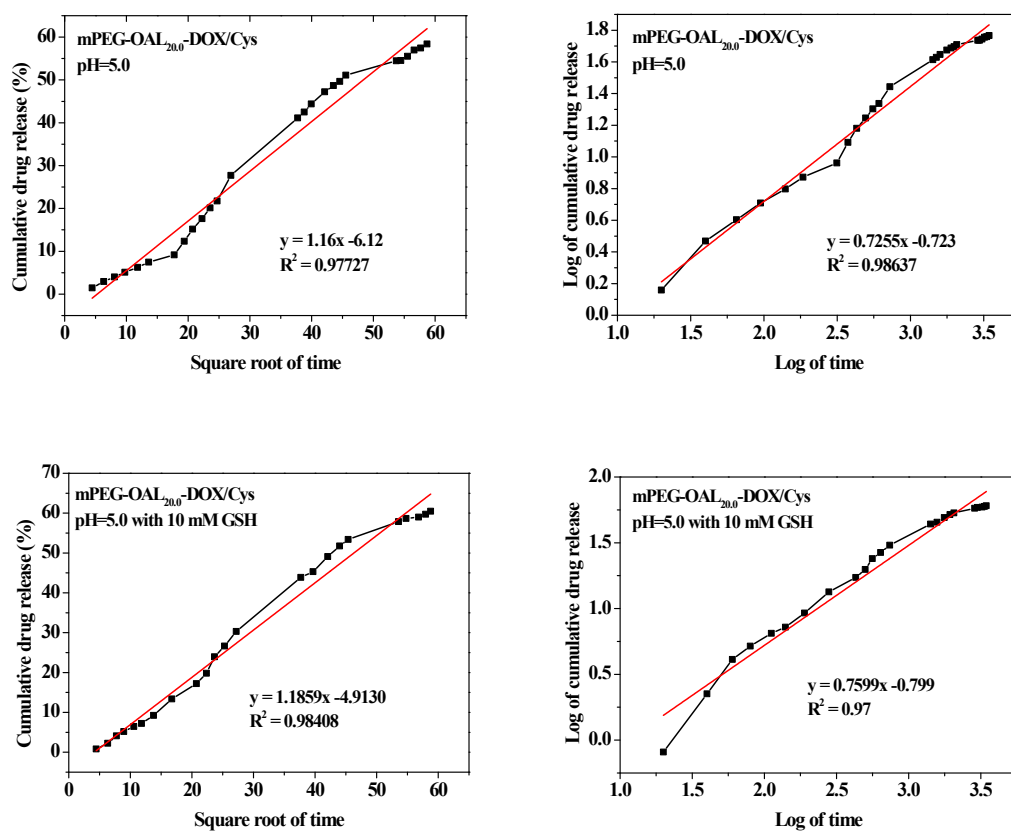

**Figure S2.** The drug release mechanism fitted with the Higuchi and Korsmeयर-Peppas models.
